# Supplementary material for: Effect of dexmedetomidine on postoperative systemic inflammation and recovery in patients undergoing digest tract cancer surgery: A meta-analysis of randomized controlled trials
Source: PubMed Central journal article supplement (PMC9518820; doi:10.3389/fonc.2022.970557), 2022-09-14
Supplement: Table_1.pdf [file Table_1.pdf]

**Supplementary table 1 GRADE Summary of findings for inflammatory mediators, T lymphocytes, cognitive function and prognosis**

| Participants (studies)               | Certainty assessment |               |              |             |                  | Summary of findings           |                       |          |                                                          |
|--------------------------------------|----------------------|---------------|--------------|-------------|------------------|-------------------------------|-----------------------|----------|----------------------------------------------------------|
|                                      | Risk of bias         | Inconsistency | Indirectness | Imprecision | Publication bias | Overall certainty of evidence | Study event rates (%) |          | Relative effect [MD or RR (95% CI)] with dexmedetomidine |
|                                      |                      |               |              |             |                  |                               | With no DEX           | With DEX |                                                          |
| 681 for CRP (7 RCTs)                 | serious <sup>a</sup> | serious       | not serious  | not serious | none             | ⊕⊕⊕○<br>Moderate <sup>1</sup> | 339                   | 342      | SMD 4.26 lower<br>(6.16 lower to 2.36 lower)             |
| 811 for TNF-α (8 RCTs)               | serious <sup>a</sup> | serious       | not serious  | serious     | none             | ⊕⊕○○<br>Low <sup>1,2</sup>    | 404                   | 407      | SMD 4.22 lower<br>(5.91 lower to 2.54 lower)             |
| 533 for IL-6 (6 RCTs)                | not serious          | serious       | not serious  | not serious | none             | ⊕⊕⊕○<br>Moderate <sup>1</sup> | 268                   | 265      | SMD 2.71 lower<br>(4.46 lower to 0.97 lower)             |
| 388 for IL-10 (4 RCTs)               | serious <sup>a</sup> | serious       | not serious  | not serious | none             | ⊕⊕⊕○<br>Moderate <sup>1</sup> | 194                   | 194      | SMD 1.74 higher<br>(0.25 higher to 3.24 higher)          |
| 1564 for Lymphocyte subsets (3 RCTs) | not serious          | serious       | not serious  | not serious | none             | ⊕⊕⊕○<br>Moderate <sup>1</sup> | 760                   | 804      | SMD 0.4 higher<br>(0.1 higher to 0.69 higher)            |
| 1362 for MMSE (9 RCTs)               | serious <sup>a</sup> | not serious   | not serious  | not serious | none             | ⊕⊕⊕⊕<br>High                  | 676                   | 686      | SMD 0.84 higher<br>(0.67 higher to 1.01 higher)          |
| 410 for POCD (6 RCTs)                | not serious          | not serious   | not serious  | not serious | none             | ⊕⊕⊕⊕<br>High                  | 32/322                | 85/322   | OR 0.31<br>(0.20 to 0.48)                                |
| 362 for First flatus time (6 RCTs)   | not serious          | serious       | not serious  | not serious | none             | ⊕⊕⊕○<br>Moderate <sup>1</sup> | 181                   | 181      | SMD 1.23 lower<br>(1.88 lower to 0.59 lower)             |

|                                        |                      |         |             |             |      |                               |     |     |                                                  |
|----------------------------------------|----------------------|---------|-------------|-------------|------|-------------------------------|-----|-----|--------------------------------------------------|
| 742 for<br>Hospital stay<br>(7 RCTs)   | serious <sup>a</sup> | serious | not serious | not serious | none | ⊕⊕⊕○<br>Moderate <sup>1</sup> | 367 | 375 | SMD 1.55 lower<br>(2.82 lower to 0.27<br>lower)  |
| 314 for<br>Extubation time<br>(5 RCTs) | not serious          | serious | not serious | not serious | none | ⊕⊕⊕○<br>Moderate <sup>1</sup> | 157 | 157 | SMD 0.74 lower<br>(2.08 lower to 0.61<br>higher) |

a. Most information from studies at low or moderate risk of bias (one study at high risk of bias)

1. rate down for inconsistency due to high heterogeneity

2. rate down for imprecision due to wide CIs
